# Supplementary material for: Mixed methods systematic review and metasummary about barriers and facilitators for the implementation of cotrimoxazole and isoniazid—Preventive therapies for people living with HIV
Source: PubMed Central journal article supplement (PMC8887777; doi:10.1371/journal.pone.0251612), 2022-03-01
Supplement: pone.0251612.s001.pdf [file pone.0251612.s001.pdf]

Additional file 1. PICO Framework (Modified PICO).

|                          |                                                                                                                                                                                                                                                                                                                                                                                                                                                                                                                                                                                                                                                                                                                                                                                                                                                 |
|--------------------------|-------------------------------------------------------------------------------------------------------------------------------------------------------------------------------------------------------------------------------------------------------------------------------------------------------------------------------------------------------------------------------------------------------------------------------------------------------------------------------------------------------------------------------------------------------------------------------------------------------------------------------------------------------------------------------------------------------------------------------------------------------------------------------------------------------------------------------------------------|
| <p><b>Population</b></p> | <p><b>TB/HIV high burden countries as per WHO for the period 2016 to 2020</b></p> <ul style="list-style-type: none"> <li>• Angola</li> <li>• Botswana</li> <li>• Brazil</li> <li>• Cameroon</li> <li>• The central African Republic</li> <li>• Chad</li> <li>• China</li> <li>• Congo</li> <li>• Democratic Republic of the Congo, DR Congo, DRC</li> <li>• Ethiopia</li> <li>• Ghana</li> <li>• Guinea-Bissau</li> <li>• India</li> <li>• Indonesia</li> <li>• Kenya</li> <li>• Lesotho</li> <li>• Liberia</li> <li>• Malawi</li> <li>• Mozambique</li> <li>• Myanmar</li> <li>• Namibia</li> <li>• Nigeria</li> <li>• Papua New Guinea, PNG</li> <li>• South Africa</li> <li>• Swaziland</li> <li>• Thailand</li> <li>• Uganda</li> <li>• United Republic of Tanzania, UR Tanzania, Tanzania</li> <li>• Zambia</li> <li>• Zimbabwe</li> </ul> |
| <p><b>Interest</b></p>   | <p><b>Barriers and Facilitators</b><br/>barrier*, facilitator*</p>                                                                                                                                                                                                                                                                                                                                                                                                                                                                                                                                                                                                                                                                                                                                                                              |
| <p><b>Context</b></p>    | <p><b>Cotrimoxazole preventive therapy (CPT), Isoniazid preventive therapy (IPT)</b><br/>Cotrimoxazol*, Trimethoprim, Sulfamethoxazole Drug Combination, Isoniazid</p>                                                                                                                                                                                                                                                                                                                                                                                                                                                                                                                                                                                                                                                                          |

Note: The asterisk (\*) is used as a truncation indicator.
