# Supplementary material for: Mixed methods systematic review and metasummary about barriers and facilitators for the implementation of cotrimoxazole and isoniazid—Preventive therapies for people living with HIV
Source: PubMed Central journal article supplement (PMC8887777; doi:10.1371/journal.pone.0251612), 2022-03-01
Supplement: pone.0251612.s003.pdf [file pone.0251612.s003.pdf]

Additional file 3. Database searches and results.

| Database                             | Detailed Search expression                                                                                                                                                                                                                                                                                                                                                                                                                                                                                                                                                                                                                                            | Results<br>8th of<br>February<br>2018 | Results<br>4th of<br>September<br>2020 |
|--------------------------------------|-----------------------------------------------------------------------------------------------------------------------------------------------------------------------------------------------------------------------------------------------------------------------------------------------------------------------------------------------------------------------------------------------------------------------------------------------------------------------------------------------------------------------------------------------------------------------------------------------------------------------------------------------------------------------|---------------------------------------|----------------------------------------|
| MEDLINE<br>(via<br>Pubmed)           | <p>#1 Cotrimoxazol* OR Co-trimoxazol* OR "Trimethoprim, Sulfamethoxazole Drug Combination"[Mesh].<br/>                     #2 Isoniazid OR "Isoniazid"[Mesh].<br/>                     #3 barrier* OR facilitat* OR challeng*.<br/>                     #4 implementation OR provision<br/> <b>(#1 OR #2) AND #3 AND #4</b></p> <p>(Cotrimoxazol* OR Co-trimoxazol* OR "Trimethoprim, Sulfamethoxazole Drug Combination"[Mesh] OR Isoniazid OR "Isoniazid"[Mesh]) AND (barrier* OR facilitat* OR challeng*) AND (implementation OR provision)</p>                                                                                                                     | n= 95                                 | n = 126                                |
| Web of<br>Science (all<br>databases) | <p>#1 Cotrimoxazol* OR Co-trimoxazol* OR "Trimethoprim, Sulfamethoxazole Drug Combination".<br/>                     #2 Isoniazid.<br/>                     #3 barrier* OR facilitat* OR challeng*.<br/>                     #4 implementation OR provision.<br/> <b>#1 AND #2 AND #3 AND #4</b></p> <p>TOPIC: (Cotrimoxazol* OR Co-trimoxazol* OR "Trimethoprim, Sulfamethoxazole Drug Combination" OR Isoniazid) AND TOPIC: (barrier* OR facilitat* OR challeng*) AND TOPIC: (implementation OR provision)<br/>                     Indexes=SCI-EXPANDED, SSCI, A&amp;HCI, CPCI-S, CPCI-SSH, ESCI, CCR-EXPANDED, IC<br/>                     Timespan=All years</p> | n= 143                                | n = 156                                |
| Scopus                               | <p>#1 Cotrimoxazol* OR Co-trimoxazol* OR "Trimethoprim, Sulfamethoxazole Drug Combination".<br/>                     #2 Isoniazid.<br/>                     #3 barrier* OR facilitat* OR challeng*.<br/>                     #4 implementation OR provision.<br/> <b>(#1 OR #2) AND #3 AND #4</b></p> <p>( TITLE-ABS-KEY ( ( cotrimoxazol* OR co-trimoxazol* OR "Trimethoprim,Sulfamethoxazole Drug Combination" OR isoniazid ) ) AND TITLE-ABS-KEY ( barrier* OR facilitat* OR challeng* ) AND TITLE-ABS-KEY ( implementation OR provision ) ) AND DOCTYPE ( ar )</p>                                                                                                | n = 146                               | n = 200                                |
